# Supplementary material
Source: publisher figshare collection journal article supplement (https://diabetesjournals.figshare.com/articles/dataset/_/17732171)
Supplement: Supplementary file 1 [file 32438483]

## **Supplementary materials**

### **Adherence to the ADA's glycemic goals in the treatment of diabetes among older Americans, 2001-2018**

Phuc Le, PhD, MPH, Gina Ayers, PharmD, Anita Misra-Hebert, MD, MPH,  
Shoshana J. Herzig, MD, MPH, William H. Herman, MD, MPH, Victoria A. Shaker, BS,  
Michael B. Rothberg, MD, MPH

Appendix table 1. Comparison of health status categories between the ADA’s Standards of Care and NHANES-based definition

| Health status       | ADA's Standards of Care criteria                                                                                                     | NHANES-based definition                                                                                                                                                                     |
|---------------------|--------------------------------------------------------------------------------------------------------------------------------------|---------------------------------------------------------------------------------------------------------------------------------------------------------------------------------------------|
| <b>Poor</b>         | Long-term care or $\geq 1$ end-stage chronic illness                                                                                 |                                                                                                                                                                                             |
|                     | stage III–IV congestive heart failure                                                                                                | Ever told to have congestive heart failure plus having “much difficulty” or “unable to do” to walk between rooms                                                                            |
|                     | oxygen-dependent lung disease                                                                                                        | Ever told to have emphysema, chronic bronchitis, or chronic obstructive pulmonary disease plus having “much difficulty” or “unable to do” to walk between rooms                             |
|                     | chronic kidney disease requiring dialysis                                                                                            | eGFR<15 mL/min/1.73 m <sup>2</sup> or received dialysis in past 12 months                                                                                                                   |
|                     | uncontrolled metastatic cancer                                                                                                       | not included due to lack of data                                                                                                                                                            |
|                     | significantly reduce life expectancy                                                                                                 | $\geq 18$ points on the Schonberg Index                                                                                                                                                     |
|                     | Moderate-to-severe cognitive impairment                                                                                              | Not included due to lack of data on severity of cognitive impairment                                                                                                                        |
|                     | $\geq 2$ ADL dependencies                                                                                                            | Having “much difficulty” or “unable to do” regarding dressing; using fork, knife, cup; walking between rooms; and getting in and out of bed                                                 |
| <b>Intermediate</b> | $\geq 3$ coexisting chronic illnesses (conditions that are serious enough to require medications or lifestyle management) including: |                                                                                                                                                                                             |
|                     | arthritis, cancer, congestive heart failure, myocardial infarction, stroke                                                           | Ever told to have each of the conditions                                                                                                                                                    |
|                     | lung disease                                                                                                                         | Ever told to have emphysema, chronic bronchitis, or chronic obstructive pulmonary disease                                                                                                   |
|                     | hypertension                                                                                                                         | Systolic blood pressure $\geq 140$ mmHg, diastolic blood pressure $\geq 90$ mmHg, or use of antihypertensive drugs                                                                          |
|                     | stage III or worse chronic kidney disease                                                                                            | eGFR<60 mL/min/1.73 m <sup>2</sup>                                                                                                                                                          |
|                     | incontinence                                                                                                                         | Answering yes to “at least a few times a week” for questions "urinated before reaching the toilet" or "leak urine during nonphysical activities"                                            |
|                     | depression                                                                                                                           | Patient Health Questionnaire (PHQ-9) score $\geq 10$ for cycles 2005-2018, no information in 2000-2004 cycles                                                                               |
|                     | falls                                                                                                                                | Not included due to lack of data                                                                                                                                                            |
|                     | Mild-to-moderate cognitive impairment                                                                                                | Answering yes to the question “are you limited in any way because of difficulty remembering or because you experience periods of confusion?” without meeting other criteria for poor health |
|                     | 2+ instrumental ADL impairments                                                                                                      | Having “much difficulty” or were “unable to do” managing money, doing house chores, preparing meals, and going out to movies/events. No information about other iADLs was available         |
| <b>Good</b>         | Few coexisting chronic illnesses, intact cognitive and functional status                                                             | Patients who are not in the poor and intermediate health groups                                                                                                                             |

Note: ADA, American Diabetes Association; ADL, activity of daily living; eGFR, estimated glomerular filtration rate; NHANES, National Health and Nutrition Examination Survey

Appendix Table 2. Prevalence (%) of patients with an HbA1c below goal by era in US older adults ( $\geq 65$  years) with diabetes who received at least one diabetes medication, 2001-2018 - Sensitivity analysis

|                                                                                                                    | All survey cycles<br>(2001-2018) | 2001-2004  | 2005-2012  | 2013-2018  | p-value<br>for trend |
|--------------------------------------------------------------------------------------------------------------------|----------------------------------|------------|------------|------------|----------------------|
| Definition 1: HbA1c $\geq 1\%$ below target plus use of medications associated with a higher risk of hypoglycemia* |                                  |            |            |            |                      |
| All patients                                                                                                       | 15 (12-17)                       | 12 (8-17)  | 12 (10-15) | 18 (14-22) | 0.031                |
| By health status                                                                                                   |                                  |            |            |            |                      |
| Good health                                                                                                        | 7 (5-9)                          | NR         | 7 (4-12)   | 4 (2-7)    | 0.006                |
| Intermediate health                                                                                                | 17 (14-21)                       | 10 (6-15)  | 11 (8-16)  | 26 (19-33) | <0.001               |
| Poor health                                                                                                        | 40 (30-51)                       | NR         | NR         | NR         | NA                   |
| Definition 2: HbA1c <7% plus use of medications associated with a higher risk of hypoglycemia                      |                                  |            |            |            |                      |
| All patients                                                                                                       | 31 (28-34)                       | 47 (41-52) | 38 (34-42) | 20 (16-25) | <0.001               |
| By health status                                                                                                   |                                  |            |            |            |                      |
| Good health                                                                                                        | 26 (22-30)                       | 52 (41-63) | 34 (28-41) | 12 (8-17)  | <0.001               |
| Intermediate health                                                                                                | 34 (30-38)                       | 42 (34-51) | 40 (34-46) | 26 (19-33) | 0.001                |
| Poor health                                                                                                        | 35 (26-45)                       | NR         | NR         | 20 (11-34) | 0.012                |

Note: Analyses were limited to patients with available HbA1c values who received at least one diabetes medication. Data are percentage (95% CI). All estimates were calculated accounting for the complex survey design. \*The American Diabetes Association's glycemic targets were specific for patient health status and time period.<sup>1-5</sup> NA, not applicable; NR, not reported based on the National Center for Health Statistics Data Presentation Standards for Proportions.<sup>6</sup>

Appendix Table 3. Prevalence (%) of patients with an HbA1c below goal by era in US older adults ( $\geq 65$  years) who reported a diagnosis of diabetes, 2001-2018 - Sensitivity analysis

|                                                                                                                    | All survey cycles<br>(2001-2018) | 2001-2004  | 2005-2012  | 2013-2018  | p-value<br>for trend |
|--------------------------------------------------------------------------------------------------------------------|----------------------------------|------------|------------|------------|----------------------|
| Definition 1: HbA1c $\geq 1\%$ below target plus use of medications associated with a higher risk of hypoglycemia* |                                  |            |            |            |                      |
| All patients                                                                                                       | 13 (11-15)                       | 9 (6-14)   | 10 (8-13)  | 16 (12-20) | 0.010                |
| By health status                                                                                                   |                                  |            |            |            |                      |
| Good health                                                                                                        | 6 (4-8)                          | NR         | 6 (4-11)   | 4 (2-7)    | 0.025                |
| Intermediate health                                                                                                | 15 (12-18)                       | 8 (5-12)   | 10 (7-14)  | 22 (16-28) | <0.001               |
| Poor health                                                                                                        | 32 (24-42)                       | NR         | 33 (22-47) | NR         | NA                   |
| Definition 2: HbA1c <7% plus use of medications associated with a higher risk of hypoglycemia                      |                                  |            |            |            |                      |
| All patients                                                                                                       | 26 (24-29)                       | 36 (30-42) | 33 (29-36) | 18 (14-22) | <0.001               |
| By health status                                                                                                   |                                  |            |            |            |                      |
| Good health                                                                                                        | 23 (19-27)                       | 41 (31-51) | 30 (25-36) | 11 (8-17)  | <0.001               |
| Intermediate health                                                                                                | 28 (25-32)                       | 32 (25-40) | 34 (29-39) | 22 (16-28) | 0.012                |
| Poor health                                                                                                        | 28 (21-37)                       | NR         | 33 (22-47) | 18 (11-30) | 0.040                |

Note: Analyses were limited to patients with available HbA1c values who reported a diagnosis of diabetes. Data are percentage (95% CI). All estimates were calculated accounting for the complex survey design. \*The American Diabetes Association's glycemic targets were specific for patient health status and time period.<sup>1-5</sup> NA, not applicable; NR, not reported based on the National Center for Health Statistics Data Presentation Standards for Proportions.<sup>6</sup>

Appendix Table 4. Use of diabetes medications by health status in US older adults ( $\geq 65$  years) with diabetes, 2001-2018

|                        | Overall       | Health status |                     |             | p-value |
|------------------------|---------------|---------------|---------------------|-------------|---------|
|                        |               | Good health   | Intermediate health | Poor health |         |
| Number of drugs, mean  | 1.1 (1.1-1.2) | 1.1 (1-1.2)   | 1.2 (1.1-1.2)       | 1.2 (1-1.3) | 0.264   |
| Any drug, %            | 68 (66-70)    | 66 (63-70)    | 69 (65-72)          | 72 (64-78)  | 0.407   |
| One drug, %            | 34 (32-36)    | 34 (31-38)    | 33 (31-36)          | 37 (30-44)  | 0.595   |
| Two drug, %            | 24 (22-26)    | 23 (20-26)    | 25 (22-28)          | 25 (18-33)  | 0.585   |
| Three or more drugs, % | 10 (9-11)     | 9 (7-11)      | 11 (9-13)           | 10 (5-18)   | 0.586   |

Note: All patients with diagnosed and undiagnosed diabetes were included in this analysis. Data are mean or percentage (95% CI). All estimates were calculated accounting for the complex survey design.

Appendix Table 5. Prevalence of patients using of diabetes medication by drug class and health status in US older adults ( $\geq 65$  years) with diabetes, 2001-2018

| Drug class                                                  | All patients | Health status |                     |             | p-value |
|-------------------------------------------------------------|--------------|---------------|---------------------|-------------|---------|
|                                                             |              | Good health   | Intermediate health | Poor health |         |
| A. Among patients who used at least one diabetes medication |              |               |                     |             |         |
| Metformin                                                   | 61 (58-63)   | 75 (71-78)    | 54 (50-58)          | 37 (28-46)  | <0.001  |
| Sulfonylureas                                               | 44 (41-47)   | 41 (37-45)    | 46 (42-50)          | 43 (35-52)  | 0.162   |
| SGLT2i                                                      | 1 (0-1)      | 0 (0-1)       | 1 (0-2)             | 0 (0-0)     | 0.442   |
| GLP-1 RA                                                    | 1 (1-2)      | 1 (0-2)       | 2 (1-3)             | 3 (0-19)    | 0.435   |
| DDP-4i                                                      | 9 (7-10)     | 7 (6-10)      | 9 (7-11)            | 13 (8-20)   | 0.110   |
| Thiazolidinediones                                          | 12 (11-14)   | 12 (9-15)     | 13 (10-16)          | 11 (6-19)   | 0.808   |
| Insulin                                                     | 27 (25-30)   | 20 (16-23)    | 31 (28-34)          | 43 (34-54)  | <0.001  |
| B. Among patients who reported a diagnosis of diabetes      |              |               |                     |             |         |
| Metformin                                                   | 50 (47-53)   | 64 (60-68)    | 44 (40-48)          | 30 (23-38)  | <0.001  |
| Sulfonylureas                                               | 37 (34-39)   | 36 (32-40)    | 38 (34-41)          | 34 (27-43)  | 0.557   |
| SGLT2i                                                      | 1 (0-1)      | 0 (0-1)       | 1 (0-2)             | 0 (0-0)     | 0.500   |
| GLP-1 RA                                                    | 1 (1-2)      | 1 (0-2)       | 1 (1-3)             | 3 (0-16)    | 0.485   |
| DDP-4i                                                      | 7 (6-9)      | 6 (5-8)       | 8 (6-10)            | 10 (6-16)   | 0.188   |
| Thiazolidinediones                                          | 10 (9-12)    | 10 (8-13)     | 11 (9-13)           | 9 (5-16)    | 0.877   |
| Insulin                                                     | 24 (22-26)   | 18 (15-21)    | 26 (24-29)          | 36 (28-45)  | <0.001  |

Note: Data are percentage (95% CI). All estimates were calculated accounting for the complex survey design. DPP-4i, dipeptidylpeptidase 4 inhibitors; GLP-1 RA, glucagon-like peptide-1 receptor agonists; SGLT2i, sodium-glucose cotransporter-2 inhibitors.

Appendix Table 6: Association between patient health status and receipt of diabetes medications associated with a higher risk of hypoglycemia in US older adults ( $\geq 65$  years) with diabetes who received  $\geq 1$  medication, 2001-2018

| Patient characteristics                            | Univariate analysis |         | Multivariable analysis |         |
|----------------------------------------------------|---------------------|---------|------------------------|---------|
|                                                    | OR (95% CI)         | p-value | OR (95% CI)            | p-value |
| Age (per 5-year increase)                          | 1.21 (0.97 - 1.5)   | 0.087   | 1.23 (0.95 - 1.58)     | 0.111   |
| Sex (ref.=female)                                  | 1.14 (0.77 - 1.68)  | 0.510   |                        |         |
| BMI                                                | 1.01 (0.99 - 1.04)  | 0.336   |                        |         |
| Nonwhite (ref.=White)                              | 1.01 (0.66 - 1.53)  | 0.968   |                        |         |
| High-school or higher (ref.=less than high-school) | 0.85 (0.53 - 1.36)  | 0.499   |                        |         |
| Uninsured (ref.=any insurance)                     | 0.27 (0.07 - 1.04)  | 0.057   | 0.22 (0.06 - 0.79)     | 0.020   |
| Income to poverty ratio (ref.= <1)                 |                     |         |                        |         |
| 1-<2                                               | 0.95 (0.54 - 1.65)  | 0.842   |                        |         |
| 2-<4                                               | 0.91 (0.48 - 1.75)  | 0.777   |                        |         |
| $\geq 4$                                           | 0.72 (0.35 - 1.48)  | 0.367   |                        |         |
| Smoking (ref. = never smokers)                     |                     |         |                        |         |
| Former smokers                                     | 1.09 (0.67 - 1.78)  | 0.725   | 1.16 (0.66 - 2.03)     | 0.057   |
| Current smokers                                    | 2.21 (1.12 - 4.35)  | 0.022   | 2.51 (1.03 - 6.12)     | <0.001  |
| Alcohol drinking (ref.=never drinkers)             |                     |         |                        |         |
| Some drinkers                                      | 1.01 (0.52 - 1.98)  | 0.972   |                        |         |
| Excessive drinkers                                 | 1.90 (0.45 - 8.07)  | 0.383   |                        |         |
| Health status group (ref.=good)                    |                     |         |                        |         |
| Intermediate                                       | 2.52 (1.42 - 4.48)  | 0.002   | 1.99 (1.02 - 3.89)     | 0.043   |
| Poor                                               | 5.08 (2.58 - 10.03) | <0.001  | 4.88 (2.29 - 10.4)     | <0.001  |

Note: The analysis was limited to patients who received at least one diabetes medication and had an HbA1c less than glycemic target by 1% or more. The American Diabetes Association's glycemic targets were specific for patient health status and time period.<sup>1-5</sup> All estimates were calculated accounting for the complex survey design.

Appendix Table 7: Association between patient health status and receipt of diabetes medications associated with a higher risk of hypoglycemia in US older adults ( $\geq 65$  years) who reported a diagnosis of diabetes, 2001-2018

| Patient characteristics                            | Univariate analysis |         | Multivariable analysis |         |
|----------------------------------------------------|---------------------|---------|------------------------|---------|
|                                                    | OR (95% CI)         | p-value | OR (95% CI)            | p-value |
| Age (per 5-year increase)                          | 1.13 (0.94 - 1.37)  | 0.180   | 1.10 (0.90 - 1.35)     | 0.334   |
| Sex (ref.=female)                                  | 1.23 (0.85 - 1.78)  | 0.267   |                        |         |
| BMI                                                | 1.03 (1.00 - 1.06)  | 0.049   | 1.03 (0.99 - 1.06)     | 0.095   |
| Nonwhite (ref.=White)                              | 1.06 (0.72 - 1.57)  | 0.767   |                        |         |
| High-school or higher (ref.=less than high-school) | 0.98 (0.67 - 1.45)  | 0.926   |                        |         |
| Uninsured (ref.=any insurance)                     | 0.53 (0.14 - 1.97)  | 0.344   |                        |         |
| Income to poverty ratio (ref.= <1)                 |                     |         |                        |         |
| 1-<2                                               | 1.31 (0.83 - 2.07)  | 0.238   |                        |         |
| 2-<4                                               | 1.14 (0.65 - 1.99)  | 0.644   |                        |         |
| $\geq 4$                                           | 0.89 (0.49 - 1.6)   | 0.684   |                        |         |
| Smoking (ref. = never smokers)                     |                     |         |                        |         |
| Former smokers                                     | 1.12 (0.74 - 1.71)  | 0.582   |                        |         |
| Current smokers                                    | 1.30 (0.61 - 2.75)  | 0.496   |                        |         |
| Alcohol drinking (ref.=never drinkers)             |                     |         |                        |         |
| Some drinkers                                      | 1.06 (0.56 - 2.01)  | 0.856   |                        |         |
| Excessive drinkers                                 | 1.82 (0.51 - 6.49)  | 0.353   |                        |         |
| Health status group (ref.=good)                    |                     |         |                        |         |
| Intermediate                                       | 1.92 (1.18 - 3.14)  | 0.009   | 1.75 (1.05 - 2.90)     | 0.032   |
| Poor                                               | 3.36 (1.85 - 6.09)  | <0.001  | 3.09 (1.59 - 6.03)     | 0.001   |

Note: The analysis was limited to patients who reported a diagnosis of diabetes and had an HbA1c less than glycemic target by 1% or more. The American Diabetes Association's glycemic targets were specific for patient health status and time period.<sup>1-5</sup> All estimates were calculated accounting for the complex survey design.



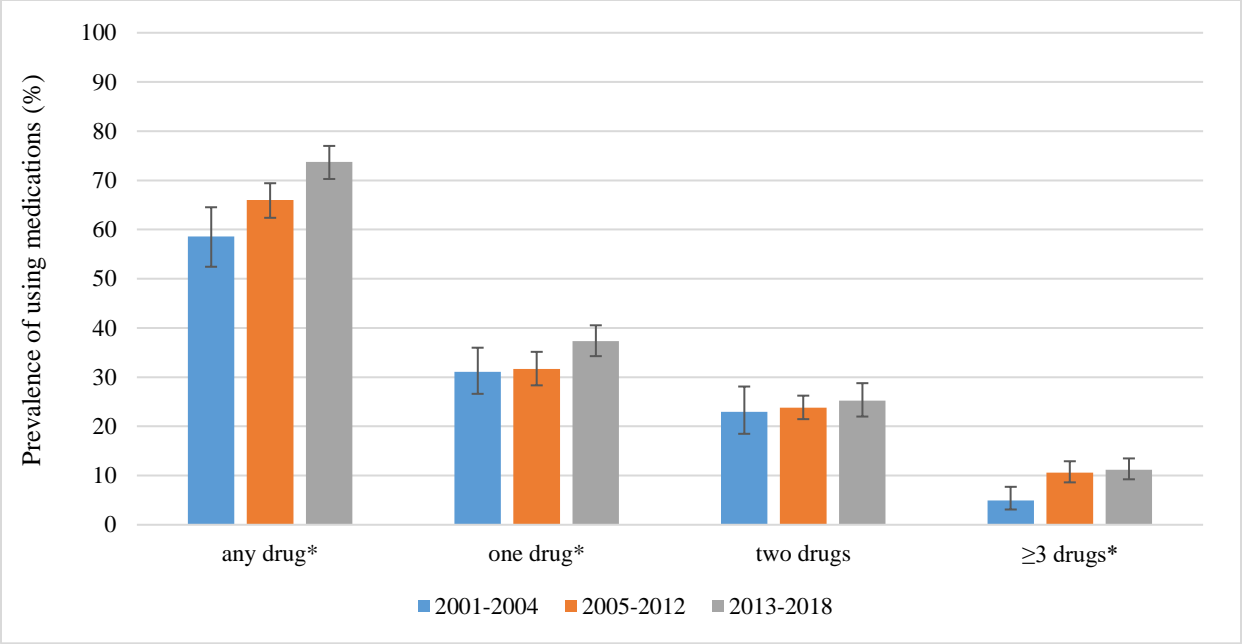

Appendix Figure 1: Prevalence (%) of patients using diabetes medications by number of drugs in US older adults ( $\geq 65$  years) with diabetes. The analysis included all patients with diagnosed and undiagnosed diabetes. All estimates were calculated accounting for the complex survey design. The vertical bars represent 95% confidence intervals. \*P-value for trends was  $<0.05$ .

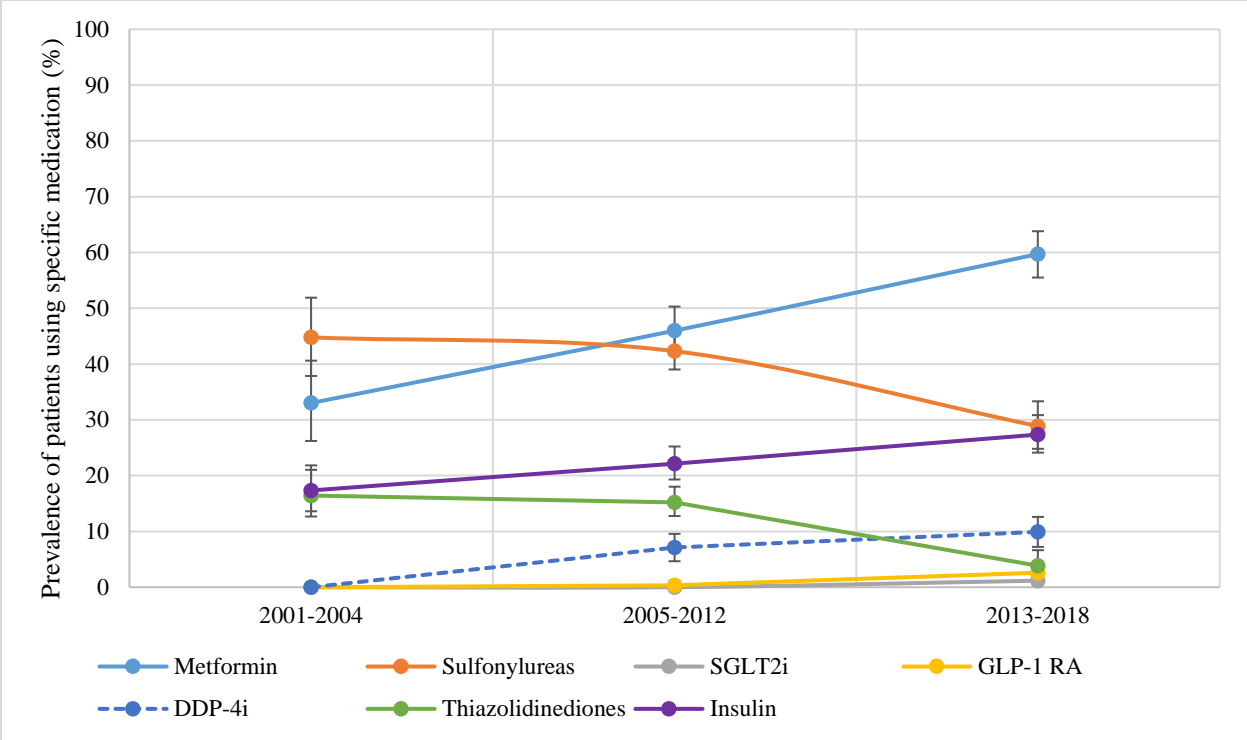

Appendix Figure 2: Prevalence (%) of patients using diabetes medications by drug class in US older adults ( $\geq 65$  years) with diagnosed diabetes, 2001-2018. The analysis was limited to patients who reported a diagnosis of diabetes. All estimates were calculated accounting for the complex survey design. The vertical bars represent 95% confidence intervals. DPP-4i, dipeptidylpeptidase 4 inhibitors; GLP-1 RA, glucagon-like peptide-1 receptor agonists; SGLT2i, sodium-glucose cotransporter-2 inhibitors.

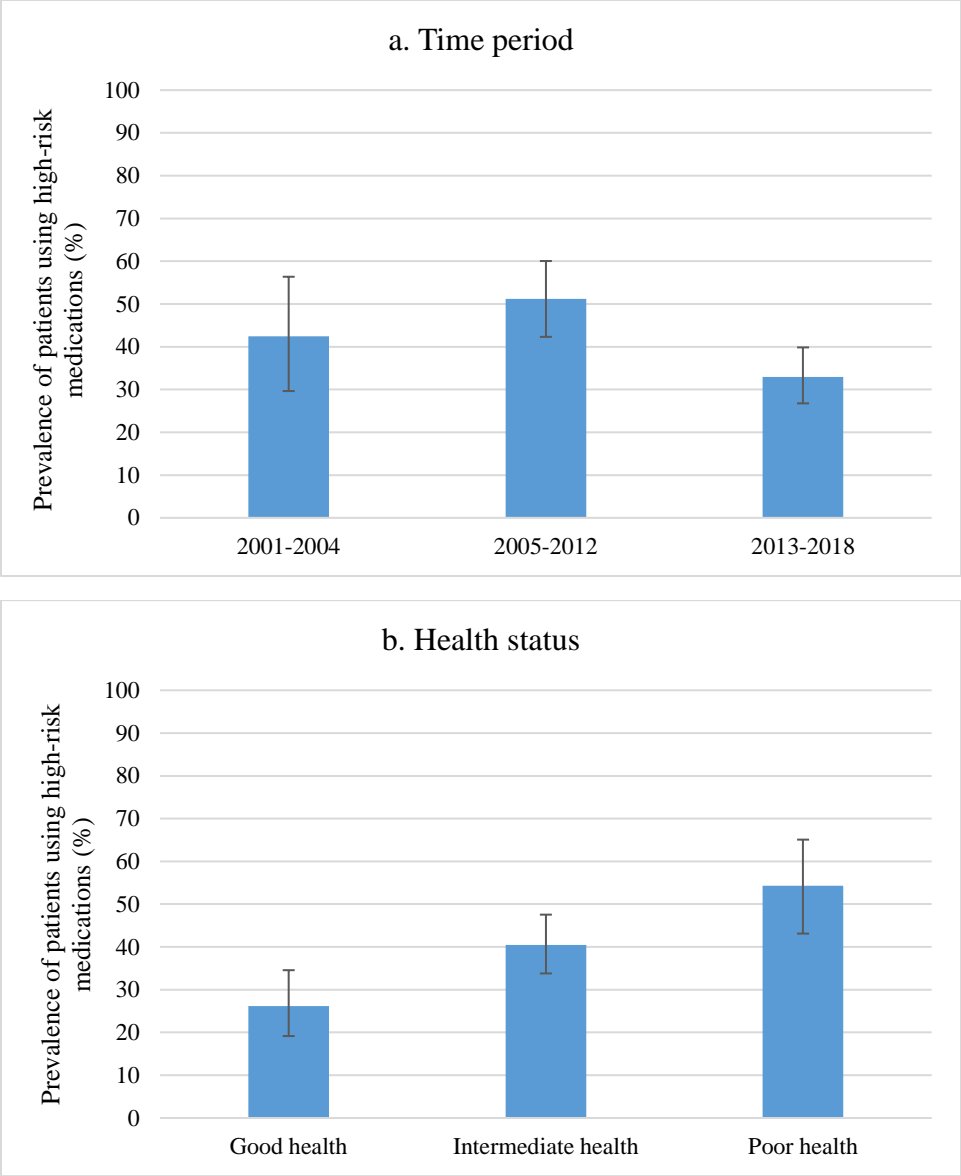

Appendix Figure 3. Prevalence (%) of patients using any diabetes medication associated with a higher risk of hypoglycemia among those who reported a diagnosis of diabetes and had an HbA1c below goal by a) time period and b) health status in US older adults ( $\geq 65$  years) with diabetes. Being below goal was defined as having an HbA1c lower than the ADA’s glycemic targets by 1% or more. The American Diabetes Association’s glycemic targets were specific for patient health status and time period.<sup>1-5</sup> Medications associated with a higher risk of hypoglycemia included sulfonylureas, meglitinides, and insulin. The analysis was limited to patients who had available HbA1c values, received at least one diabetes medication, and had an HbA1c below goal. All estimates were calculated accounting for the complex survey design. The vertical bars represent 95% confidence intervals. Both the p-value for trends over time and p-value comparing across health status were  $<0.05$ .

## Reference

1. Kirkman MS, Briscoe VJ, Clark N, et al. Diabetes in older adults. *Diabetes Care*. 2012;35(12):2650-2664.
2. American Diabetes Association. Standards of medical care in diabetes--2013. *Diabetes Care*. 2013;36 Suppl 1:S11-66.
3. American Diabetes Association. Standards of medical care for patients with diabetes mellitus. *Diabetes Care*. 2003;26 Suppl 1:S33-50.
4. American Diabetes Association. Standards of medical care in diabetes. *Diabetes Care*. 2004;27 Suppl 1:S15-35.
5. Brown AF, Mangione CM, Saliba D, Sarkisian CA, California Healthcare Foundation/American Geriatrics Society Panel on Improving Care for Elders with D. Guidelines for improving the care of the older person with diabetes mellitus. *J Am Geriatr Soc*. 2003;51(5 Suppl Guidelines):S265-280.
6. Parker JD, Talih M, Malec DJ, et al. National Center for Health Statistics Data Presentation Standards for Proportions. *Vital Health Stat 2*. 2017(175):1-22.
